# Supplementary material for: Genetic Structure of IQ, Phonemic Decoding Skill, and Academic Achievement
Source: Front Genet. 2019 Mar 18;10:195. doi: 10.3389/fgene.2019.00195 (PMC6436069; doi:10.3389/fgene.2019.00195)
Supplement: TABLE S2 — Full Cholesky decomposition standardized parameter estimates with 95% confidence intervals. [file Table_2.xlsx]

## Sheet: Sheet1
Supplementary Table 2. Full Cholesky Decomposition Standardised Parameter Estimates with 95% Confidence Intervals.
	A Parameter [variable, factor]	Estimate	Lower	Upper		C Parameter [variable, factor]	Estimate	Lower	Upper		E Parameter [variable, factor]	Estimate	Lower	Upper
VIQ	CholACE.std_a[1,1]	0.773231	0.68	0.8		CholACE.std_c[1,1]	0.455175	0.28	0.57		CholACE.std_e[1,1]	0.441508	0.4	0.49
PIQ	CholACE.std_a[2,1]	0.457775	0.35	0.57		CholACE.std_c[2,1]	0.284218	0.1	0.43		CholACE.std_e[2,1]	0.0536555	-0.01	0.12
RD	CholACE.std_a[3,1]	0.442905	0.32	0.56		CholACE.std_c[3,1]	0.24729	0.03	0.41		CholACE.std_e[3,1]	0.0901197	0.02	0.16
CC	CholACE.std_a[4,1]	0.721683	0.6	0.83		CholACE.std_c[4,1]	0.299155	0.07	0.47		CholACE.std_e[4,1]	0.00405388	-0.06	0.07
CP	CholACE.std_a[5,1]	0.493678	0.37	0.64		CholACE.std_c[5,1]	0.398206	0.17	0.54		CholACE.std_e[5,1]	0.0400252	-0.05	0.13
ATP	CholACE.std_a[6,1]	0.653438	0.53	0.77		CholACE.std_c[6,1]	0.322895	0.1	0.49		CholACE.std_e[6,1]	0.118607	0.05	0.19
PIQ	CholACE.std_a[2,2]	0.691407	0.61	0.61		CholACE.std_c[2,2]	0.0685953	0	0.28		CholACE.std_e[2,2]	0.473323	0.43	0.52
RD	CholACE.std_a[3,2]	0.00855488	-0.13	0.11		CholACE.std_c[3,2]	0.0578562	-0.34	0.34		CholACE.std_e[3,2]	-0.0166376	-0.09	0.05
CC	CholACE.std_a[4,2]	0.0598982	-0.07	0.17		CholACE.std_c[4,2]	-0.0689963	-0.33	0.33		CholACE.std_e[4,2]	0.0648332	0	0.13
CP	CholACE.std_a[5,2]	-0.0627978	-0.19	0.05		CholACE.std_c[5,2]	-0.0516644	-0.32	0.32		CholACE.std_e[5,2]	0.0277721	-0.07	0.12
ATP	CholACE.std_a[6,2]	0.16352	0.05	0.27		CholACE.std_c[6,2]	-0.0711988	-0.34	0.34		CholACE.std_e[6,2]	0.10885	0.04	0.18
RD	CholACE.std_a[3,3]	0.670971	0.56	0.73		CholACE.std_c[3,3]	0.15593	0	0.35		CholACE.std_e[3,3]	0.506308	0.47	0.55
CC	CholACE.std_a[4,3]	-0.0947296	-0.25	0.04		CholACE.std_c[4,3]	0.142798	-0.33	0.33		CholACE.std_e[4,3]	0.0922551	0.02	0.16
CP	CholACE.std_a[5,3]	0.084913	-0.08	0.21		CholACE.std_c[5,3]	-0.0208527	-0.32	0.32		CholACE.std_e[5,3]	0.0984639	0	0.2
ATP	CholACE.std_a[6,3]	-0.157265	-0.32	-0.03		CholACE.std_c[6,3]	0.160815	-0.32	0.34		CholACE.std_e[6,3]	0.0899747	0.01	0.16
CC	CholACE.std_a[4,4]	0.345625	0	0.47		CholACE.std_c[4,4]	9.66336e-05	0	0		CholACE.std_e[4,4]	0.468807	0.42	0.52
CP	CholACE.std_a[5,4]	0.32479	-0.25	0.44		CholACE.std_c[5,4]	2.97461e-05	-0.28	0.28		CholACE.std_e[5,4]	0.016923	-0.07	0.11
ATP	CholACE.std_a[6,4]	0.0924018	-0.37	0.33		CholACE.std_c[6,4]	-4.01676e-05	-0.28	0.28		CholACE.std_e[6,4]	0.0631554	0	0.13
CP	CholACE.std_a[5,5]	0.0652168	0	0.34		CholACE.std_c[5,5]	9.8562e-05	0	0		CholACE.std_e[5,5]	0.679235	0.62	0.73
ATP	CholACE.std_a[6,5]	0.330523	-0.42	0.42		CholACE.std_c[6,5]	2.43388e-05	-0.28	0.28		CholACE.std_e[6,5]	-0.0124739	-0.07	0.05
ATP	CholACE.std_a[6,6]	0.0079548	0	0.42		CholACE.std_c[6,6]	9.9197e-05	0	0		CholACE.std_e[6,6]	0.479951	0.43	0.53
